# Supplementary material for: Comparative analysis of sugarcane bagasse metagenome reveals unique and conserved biomass-degrading enzymes among lignocellulolytic microbial communities
Source: PubMed Central journal article supplement (PMC4337096; doi:10.1186/s13068-015-0200-8), 2015-02-08

Figure S1

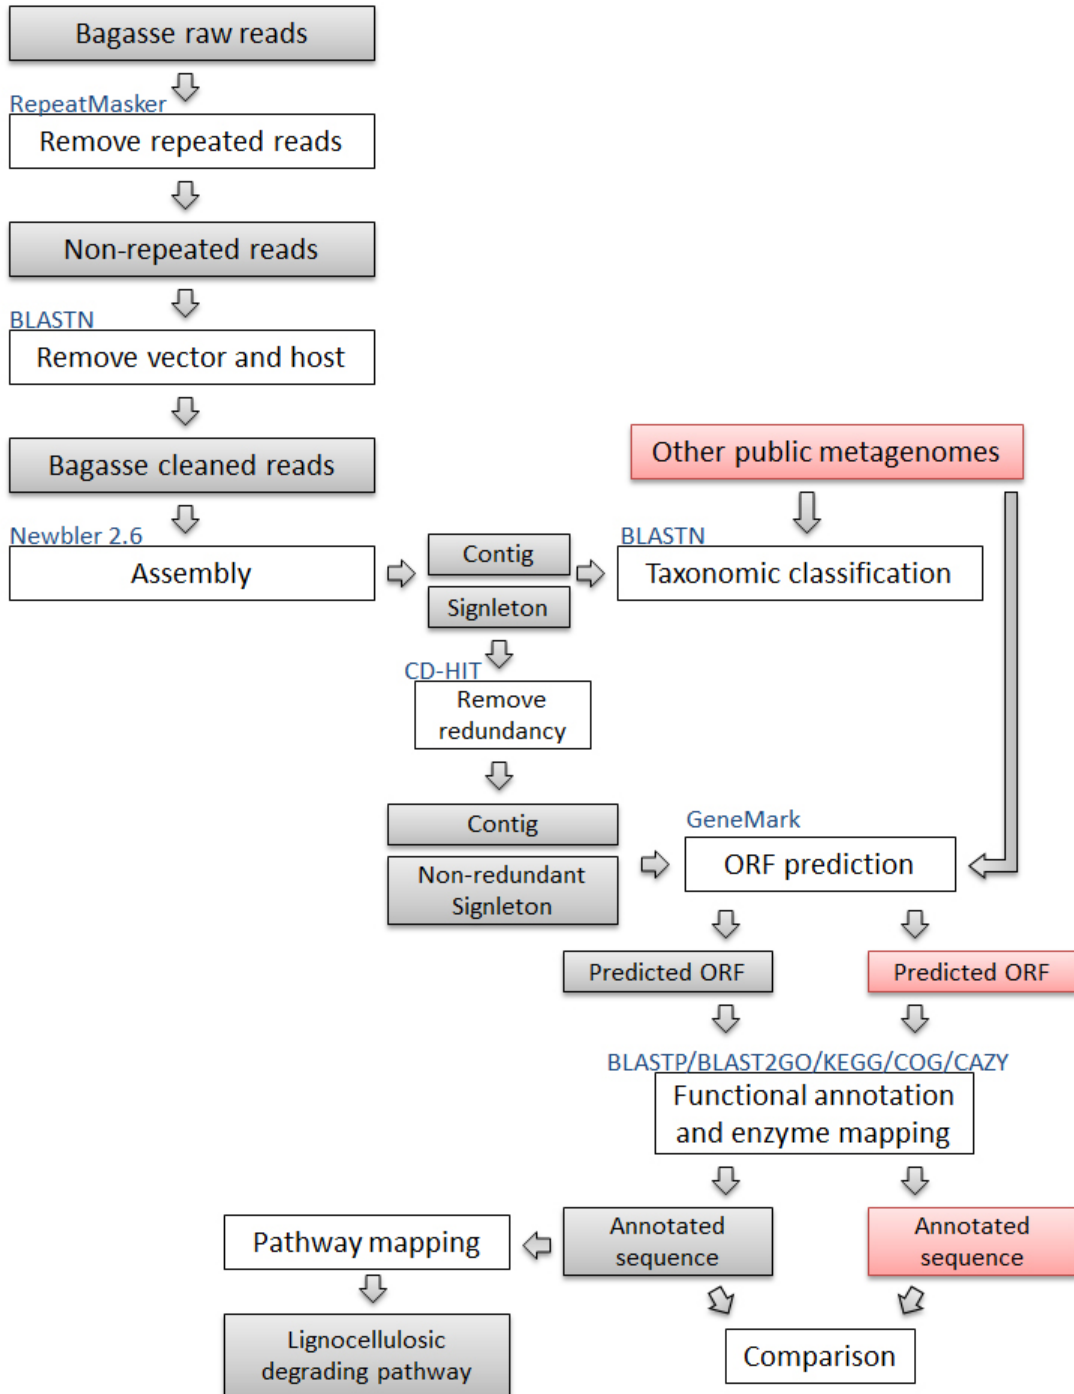

Supplement: 13068_2015_200_MOESM1_ESM.pdf [file 13068_2015_200_MOESM1_ESM.pdf]
